# Supplementary material for: Fabrication and properties of temperature-responsive imprinted sensors based on fluorescently labeled yeast cells via MVL ATRP
Source: Royal Society of Chemistry journal article supplement (doi:10.1039/d4ay00905c), 2024-01-01
Supplement: d4ay00905c1.pdf [file d4ay00905c1.pdf]

## **Fabrication and properties of temperature-responsive imprinted sensor based on fluorescently-labeled yeast cells via MVL ATRP**

Yue Chen<sup>1</sup>, Shaokai Du<sup>1</sup>, Ailu Cui, Shipeng Jiang, Yuxuan He, Shuhan Yang, Ruyi Ma, Yue Sun\*

School of Chemistry and Chemical Engineering, Liaoning Normal University, Dalian 116029, China

\*Corresponding author:

Email: [yuesun@lnnu.edu.cn](mailto:yuesun@lnnu.edu.cn)

Postal address: Yue Sun, School of Chemistry and Chemical Engineering, Liaoning Normal University, Dalian 116029, China

<sup>1</sup> These authors contributed equally.

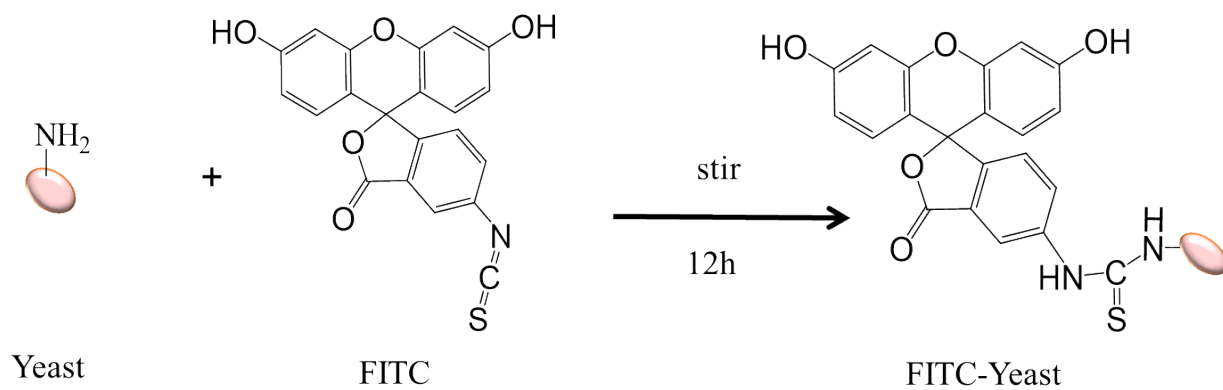

Fig. S1 Schematic of FITC-Yeast synthesis

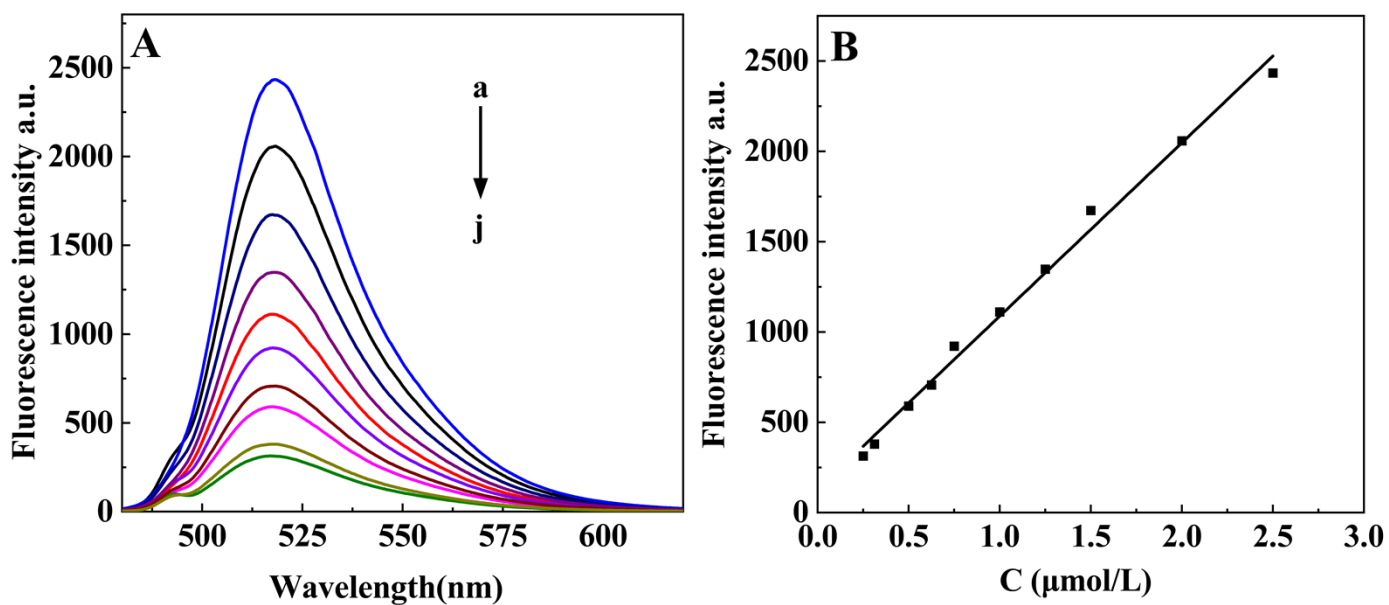

Fig. S2 Fluorescence spectra of FITC solutions with different concentrations (concentration of FITC solutions from Curve a to Curve j were 2.50, 2.00, 1.50, 1.25, 1.00, 0.75, 0.625, 0.50, 0.3125, 0.25  $\mu\text{mol L}^{-1}$ ) (A). Equation of linear regression (B)

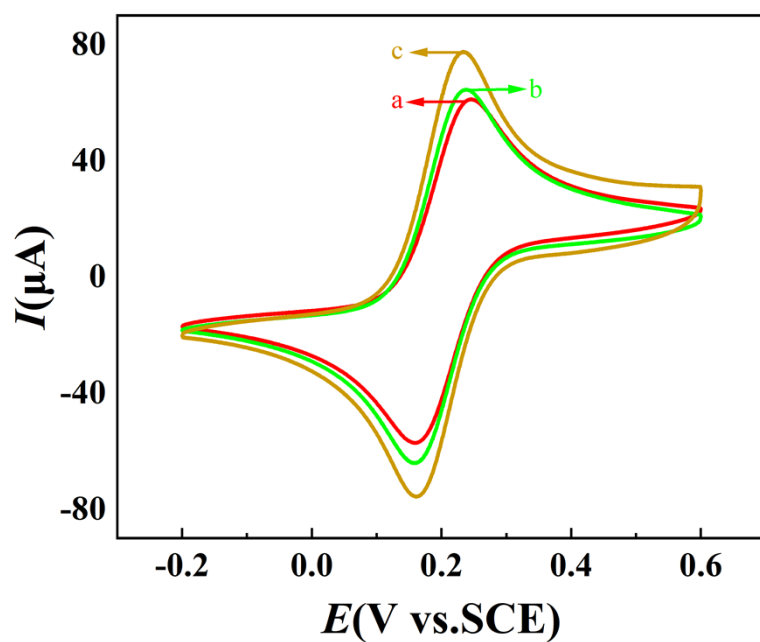

Fig. S3 CV curves of different modified electrode (a-AuNPs/Au, b-Ti<sub>3</sub>C<sub>2</sub>T<sub>x</sub>/AuNPs/Au, c-AuNPs/Ti<sub>3</sub>C<sub>2</sub>T<sub>x</sub>/AuNPs/Au, the electrolyte solution was 0.1 mol L<sup>-1</sup> KCl+5 mmol L<sup>-1</sup> [Fe(CN)<sub>6</sub>]<sup>3-/4-</sup>in PBS)

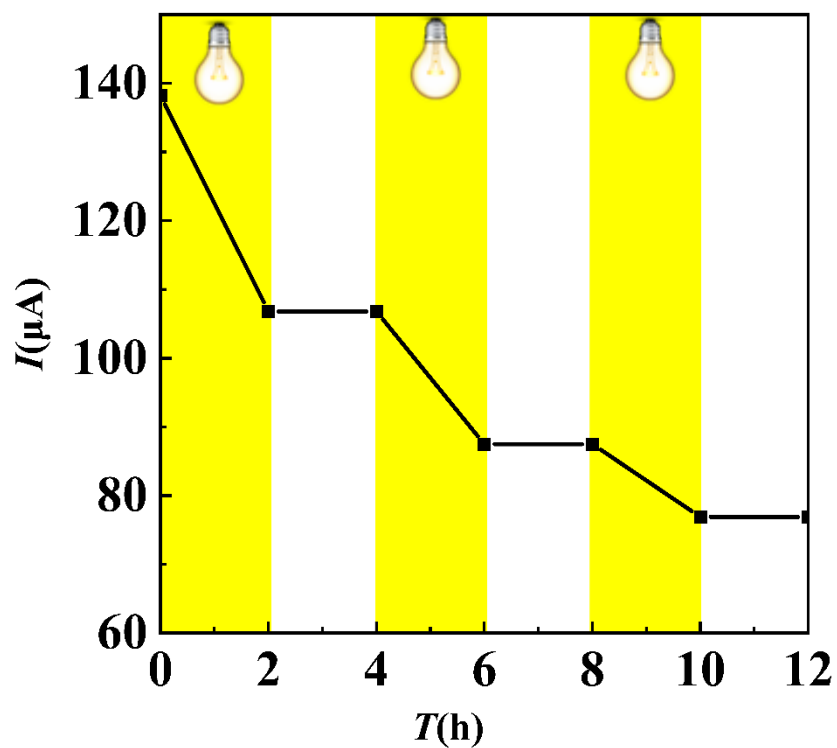

Fig. S4 The "on-off" experiment

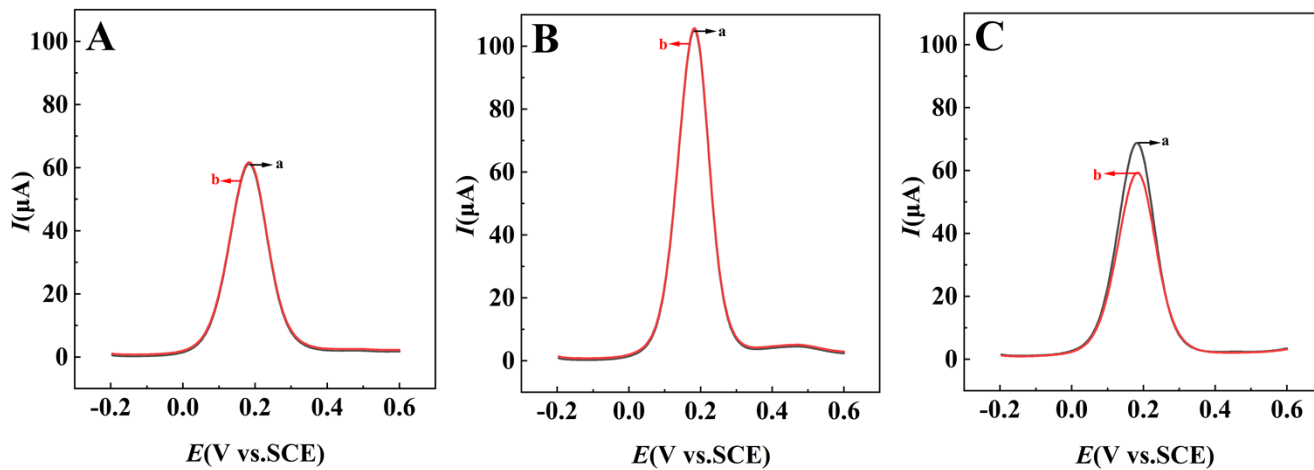

**Fig. S5** The DPV signal response of different modified electrodes: (A) AuNPs/Au, (B) AuNPs/Ti<sub>3</sub>C<sub>2</sub>T<sub>x</sub>/AuNPs/Au, (C) CIPs/AuNPs/Ti<sub>3</sub>C<sub>2</sub>T<sub>x</sub>/AuNPs/Au: a-blank, b-after combining with yeast cell solution ( $1.0 \times 10^6$  cells mL<sup>-1</sup>)

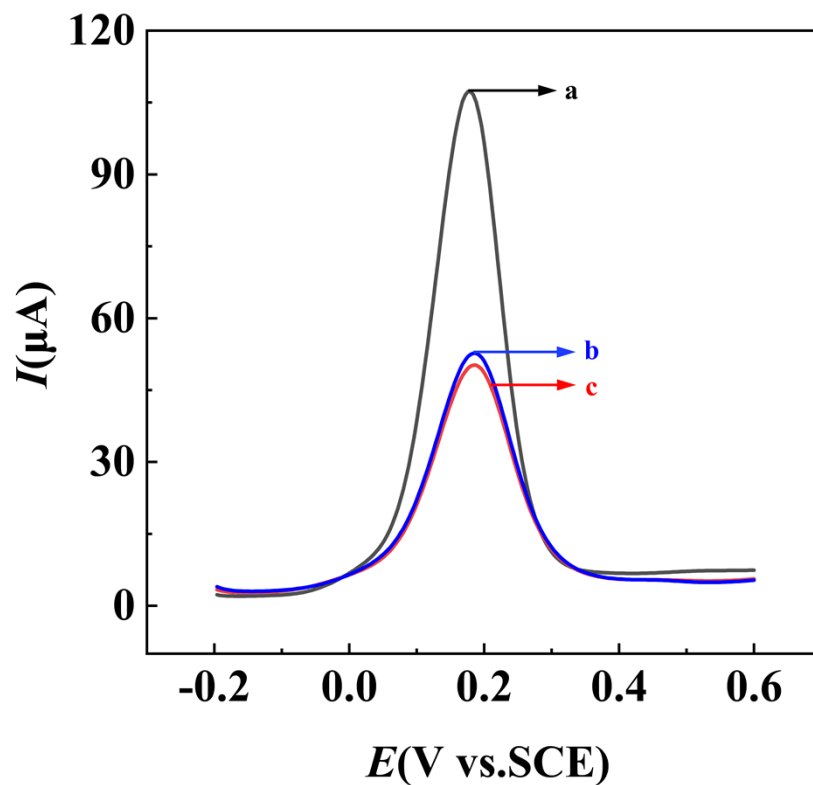

**Fig. S6** DPV curves of imprinted polymer modified electrode: blank (a), mixed solution (b) and yeast cell (c) detection by CIPs/AuNPs/Ti<sub>3</sub>C<sub>2</sub>T<sub>x</sub>/AuNPs/Au

**Table S1** Comparison of the linear response range of CIPs/AuNPs/Ti<sub>3</sub>C<sub>2</sub>T<sub>x</sub>/AuNPs/Au and other materials for the determination of yeast cell<sup>a</sup>

| Sensor                                                             | Analyte     | Detection Method          | Linear Response Range (cells mL <sup>-1</sup> ) | Detection Limit (cells mL <sup>-1</sup> ) | Reference        |
|--------------------------------------------------------------------|-------------|---------------------------|-------------------------------------------------|-------------------------------------------|------------------|
| Imprinted polymer-modified screen-printed carbon electrode         |             | Thermal resistance method | 1×10 <sup>2</sup> - 1×10 <sup>7</sup>           | 22                                        | 1                |
| Polyurethane imprinted polymer                                     | Yeast cells | Impedance spectroscopy    | 3×10 <sup>1</sup> - 1×10 <sup>5</sup>           | 30                                        | 2                |
| Polydopamine imprinted polymer                                     |             | Chronopotentiometry       | 1×10 <sup>2</sup> - 1.5×10 <sup>2</sup>         | 50                                        | 3                |
| CIPs/AuNPs/Ti <sub>3</sub> C <sub>2</sub> T <sub>x</sub> /AuNPs/Au |             | DPV                       | 1×10 <sup>2</sup> - 1×10 <sup>9</sup>           | 11                                        | <b>This Work</b> |

<sup>a</sup>The data units are unified for ease of comparison

**Table S2** Determination in real samples (n=3)

| Analyte     | Original Concentration (cells mL <sup>-1</sup> ) | Added Yeast Cell Concentration (cells mL <sup>-1</sup> ) | Detected Concentration (cells mL <sup>-1</sup> ) | Recovery Rate (%) | RSD (%) |
|-------------|--------------------------------------------------|----------------------------------------------------------|--------------------------------------------------|-------------------|---------|
| Yeast Cells | 1.0×10 <sup>4</sup>                              | 1.0×10 <sup>4</sup>                                      | 2.08×10 <sup>4</sup>                             | 108.0             | 2.03    |
|             |                                                  | 2.0×10 <sup>4</sup>                                      | 2.97×10 <sup>4</sup>                             | 98.5              | 3.25    |
|             |                                                  | 3.0×10 <sup>4</sup>                                      | 4.05×10 <sup>4</sup>                             | 101.7             | 2.67    |

## References

- O. Jamieson, K. Betlem, N. Mansouri, R. D. Crapnell, F. S. Vieira, A. Hudson, et al, Electropolymerised molecularly imprinted polymers for the heat-transfer based detection of microorganisms: A proof-of-concept study using yeast, *Therm. Sci. Eng. Prog.*, 2021, **24**, 100956.
- W. Stilman, D. Yongabi, S. B. Sichani, F. Thesseling, O. Deschaume, T. Putzeys, et al, Detection of yeast strains by combining surface-imprinted polymers with impedance-based readout, *Sens. Actuators, B*, 2021, **340**, 129917.
- R. Liang, J. Ding, S. Gao, W. Qin, Mussel-inspired surface-imprinted sensors for potentiometric label-free detection of biological species, *Angew. Chem., Int. Ed.*, 2017, **56**(24), 6833-6837.
